# Supplementary material for: Effect of Boron and Water-to-Cement Ratio on the Performances of Laboratory Prepared Belite-Ye’elimite-Ferrite (BYF) Cements
Source: MDPI journal article supplement (doi:10.3390/ma14174862), 2021-08-26
Supplement: s1 [file s1]

Supporting information

# Effect of boron and water-to-cement ratio on the performances of laboratory prepared Belite-Ye'elimite-Ferrite (BYF) cements.

Raquel Pérez-Bravo<sup>1</sup>, Alejandro Morales-Cantero<sup>1</sup>, Margherita Bruscolini<sup>2</sup>, Miguel A.G. Aranda<sup>1</sup>, Isabel Santacruz<sup>1</sup>, Angeles G. De la Torre<sup>1,a</sup>

This supporting information contains eleven figures: PSD of st-BYF and B-BYF (Figure S1), LXRPD raw patterns of hydrated pastes (Figures S2 to S8) and Rietveld plots of selected pastes hydrated at 7, 28 and 120 d (Figures S9 to S11).

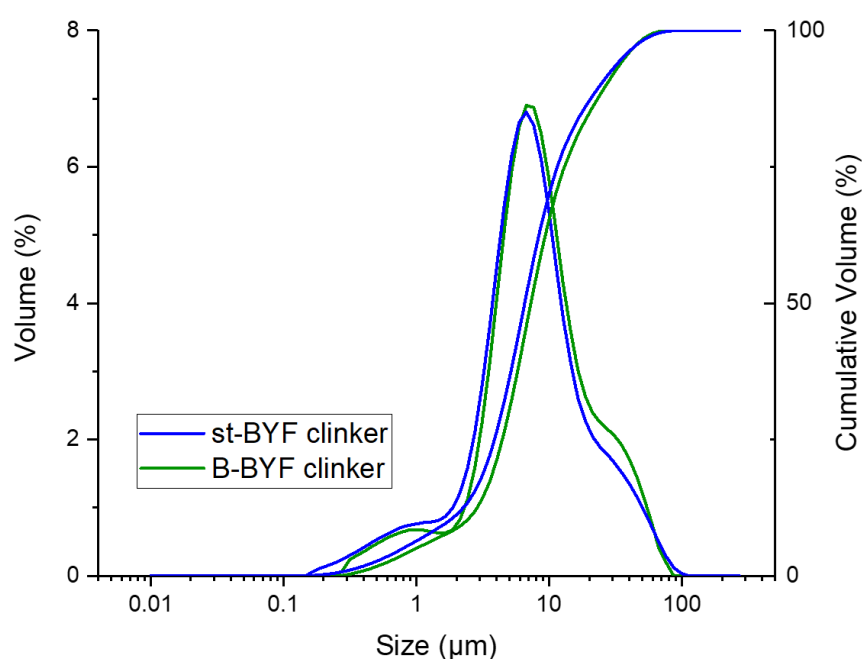

**Figure S1.** Particle size distribution of BYF clinkers.

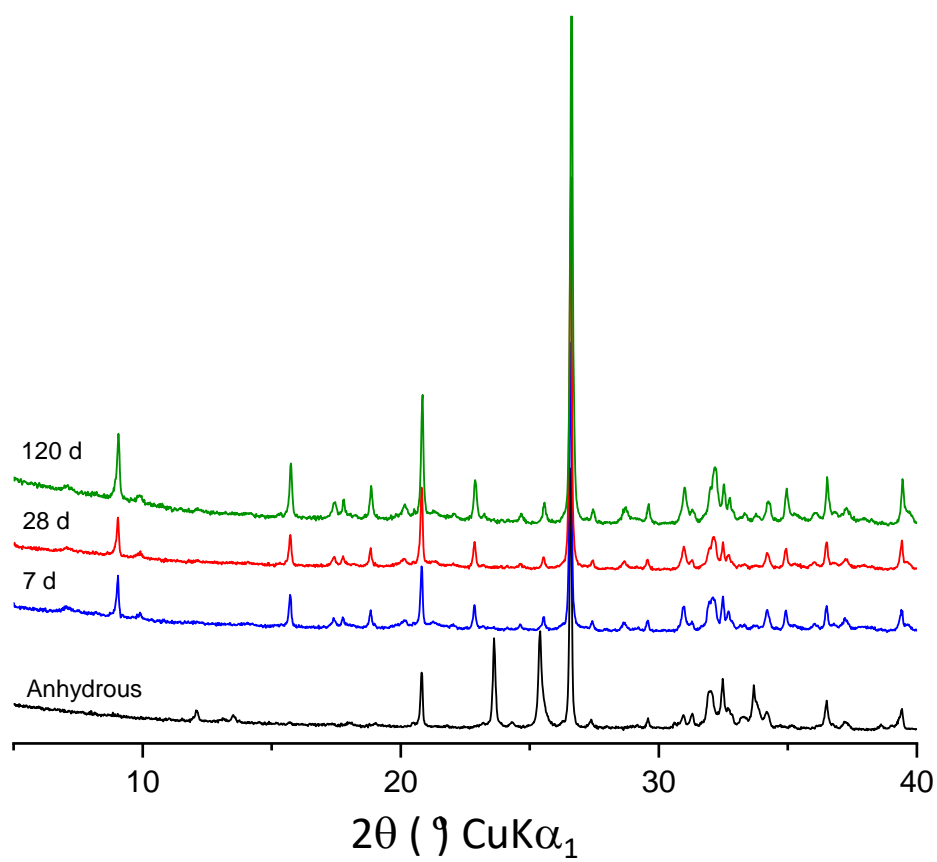

**Figure S2.** Raw LXRPD data of st-BYF\_wc040\_03SP.

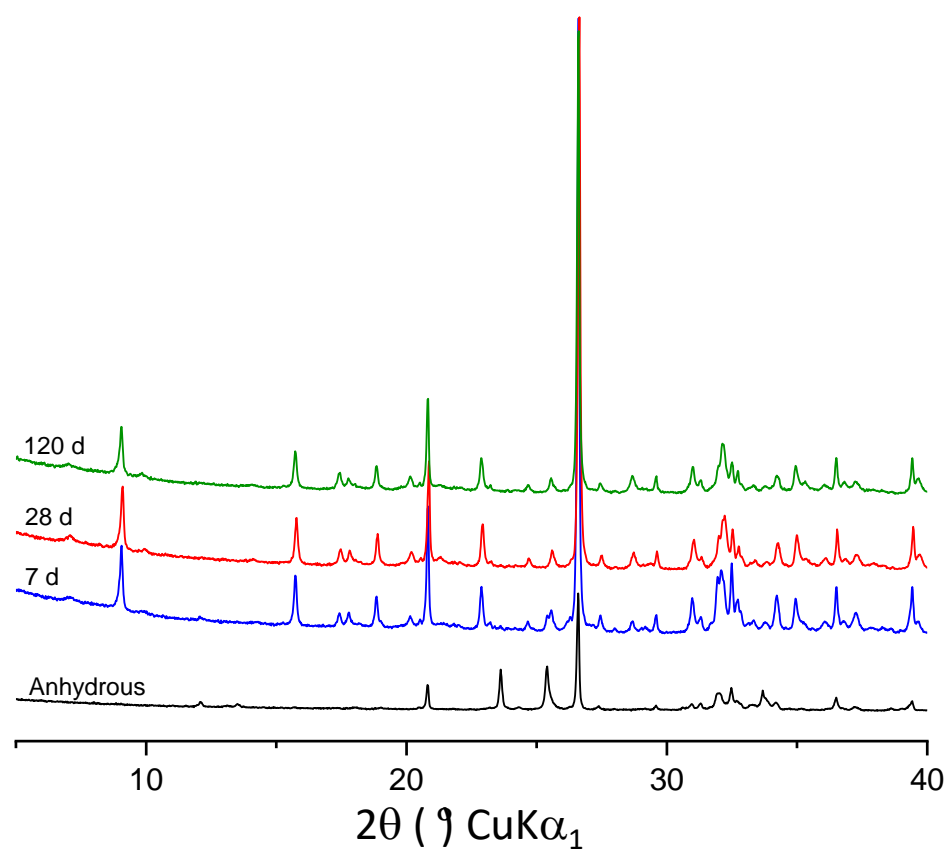

**Figure S3.** Raw LXRPD data of st-BYF\_wc040\_01SP\_0.25B<sub>2</sub>O<sub>3</sub>.

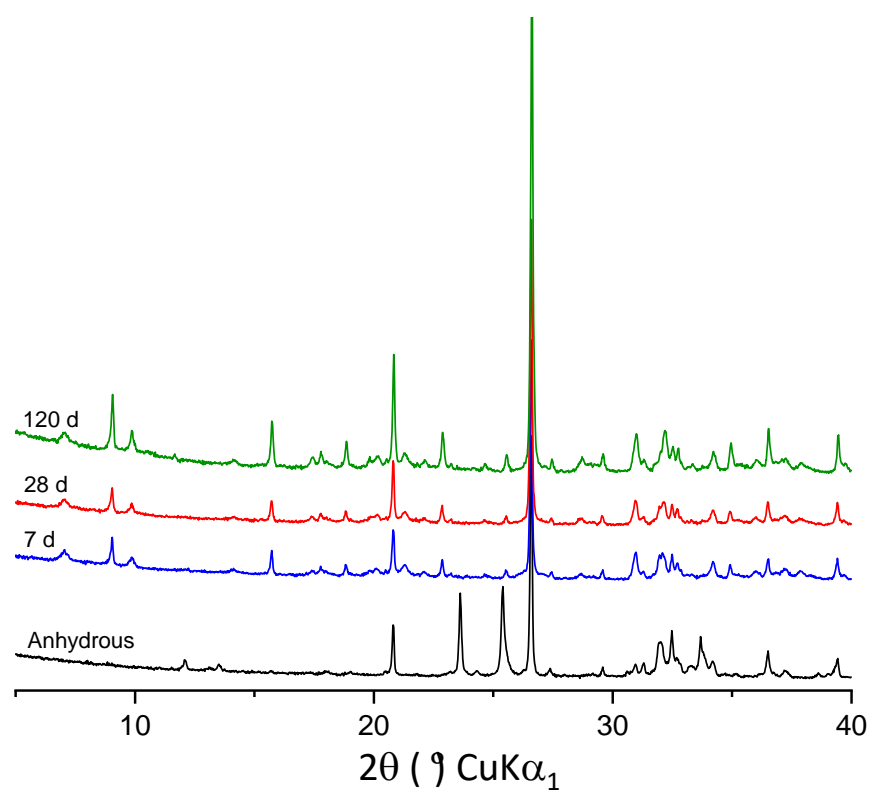

**Figure S4.** Raw LXRPD data of st-BYF\_wc050.

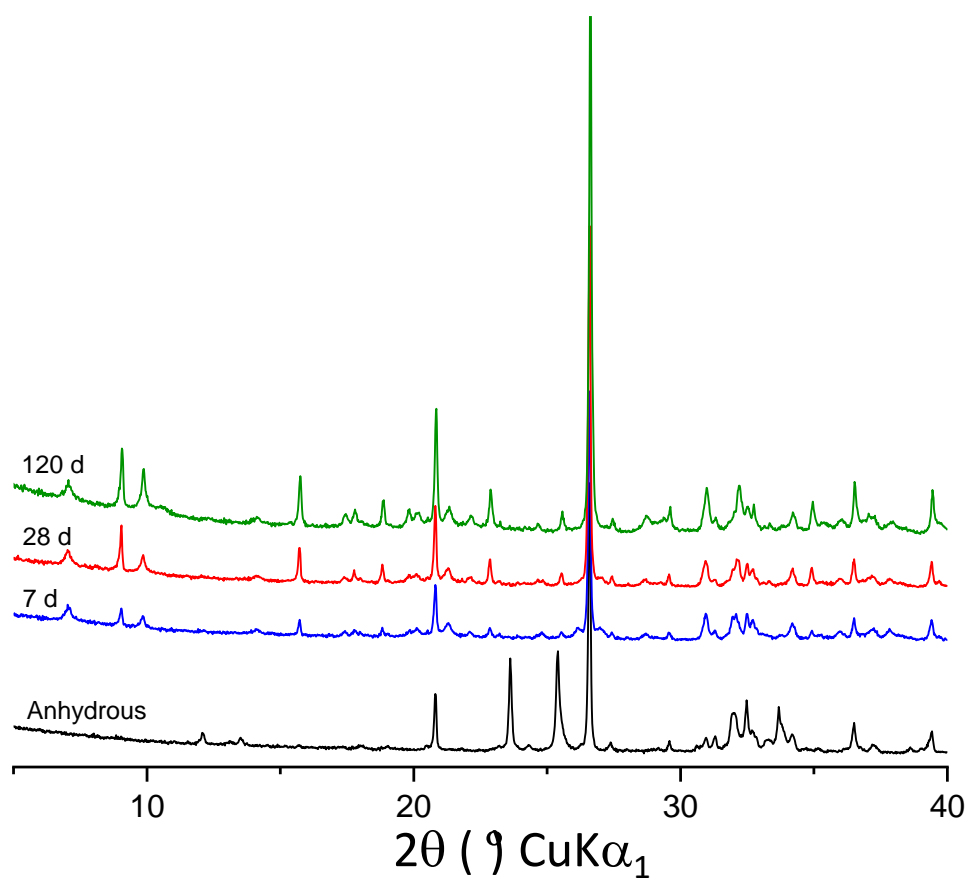

**Figure S5.** Raw LXRPD data of st-BYF\_wc060.

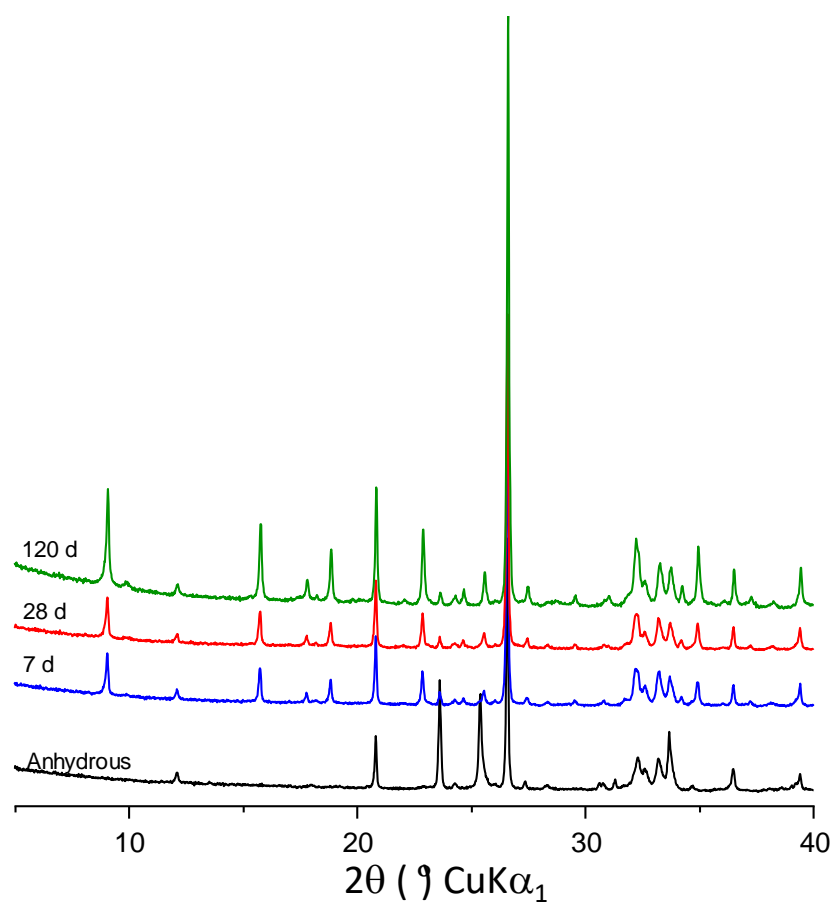

**Figure S6.** Raw LXRPD data of B-BYF\_wc040\_04SP.

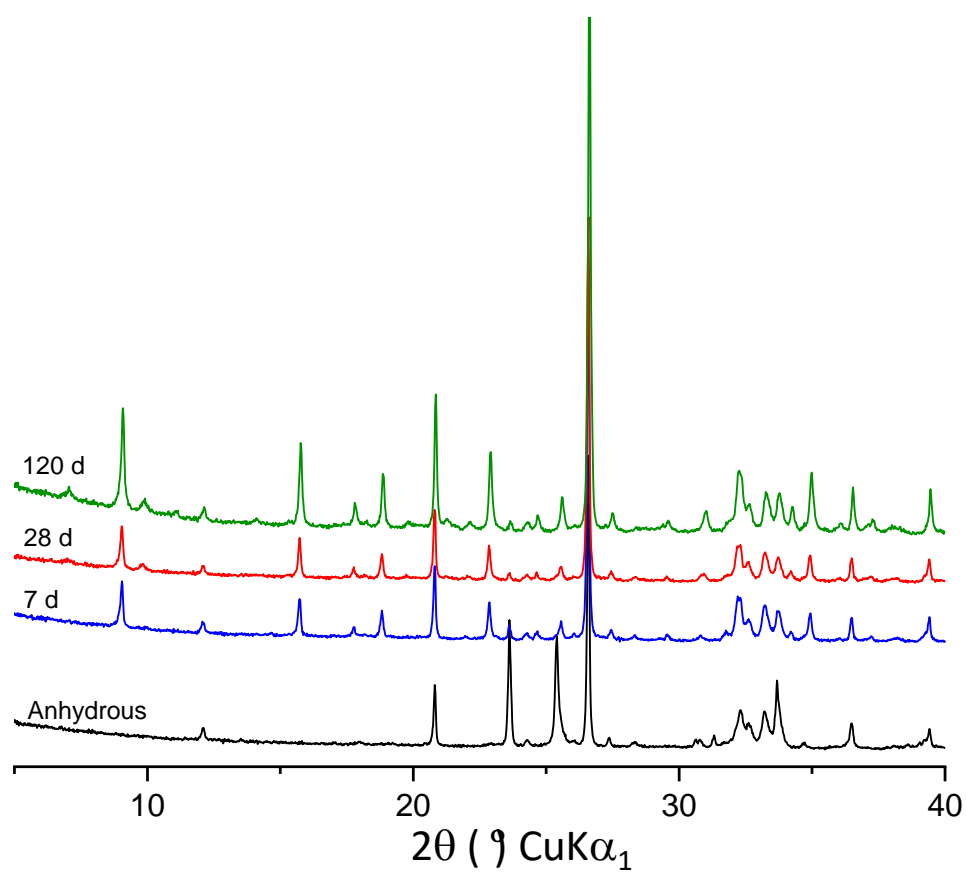

**Figure S7.** Raw LXRPD data of B-BYF\_wc050\_03SP.

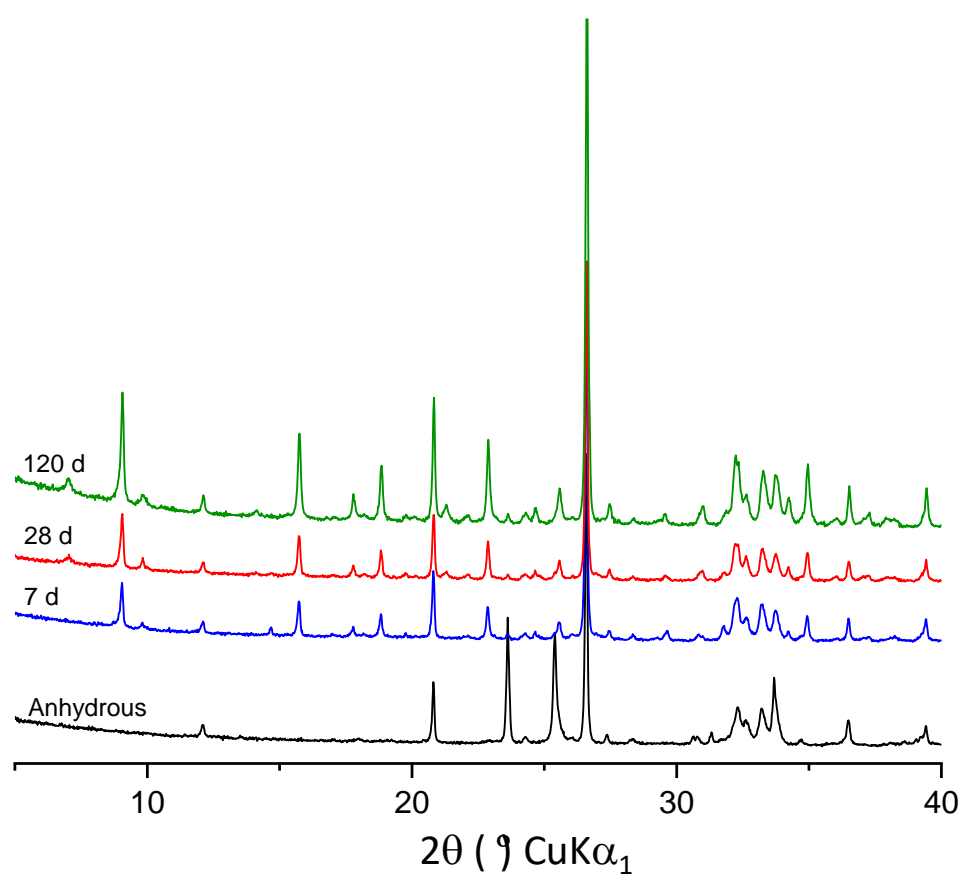

**Figure S8.** Raw LXRPD data of B-BYF\_wc060.



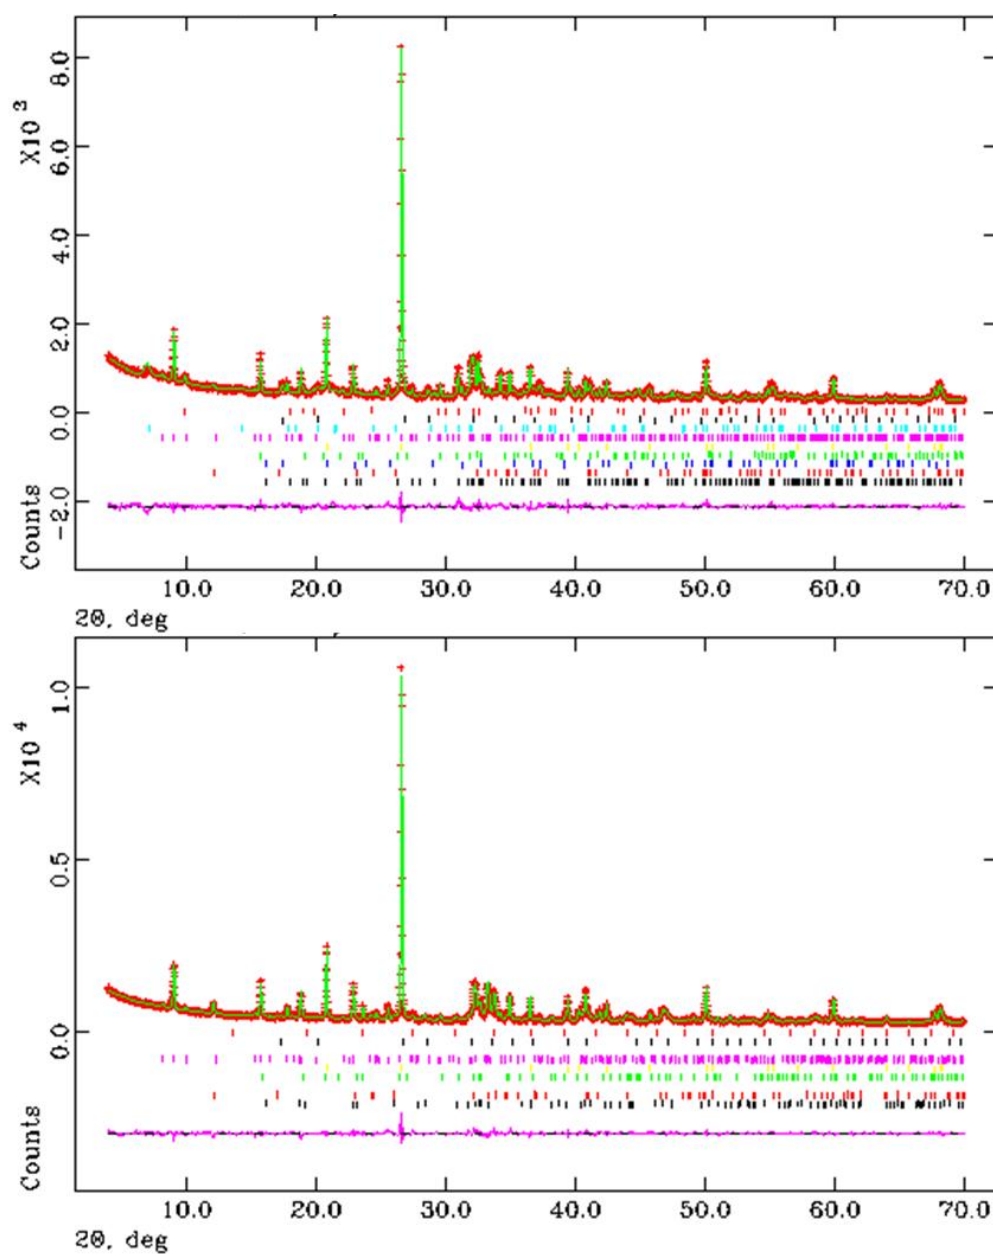

Figure S9. Rietveld plots of st-BYF\_wc040\_03SP (top) and B-BYF\_wc040\_04SP (bottom) at 7 days.

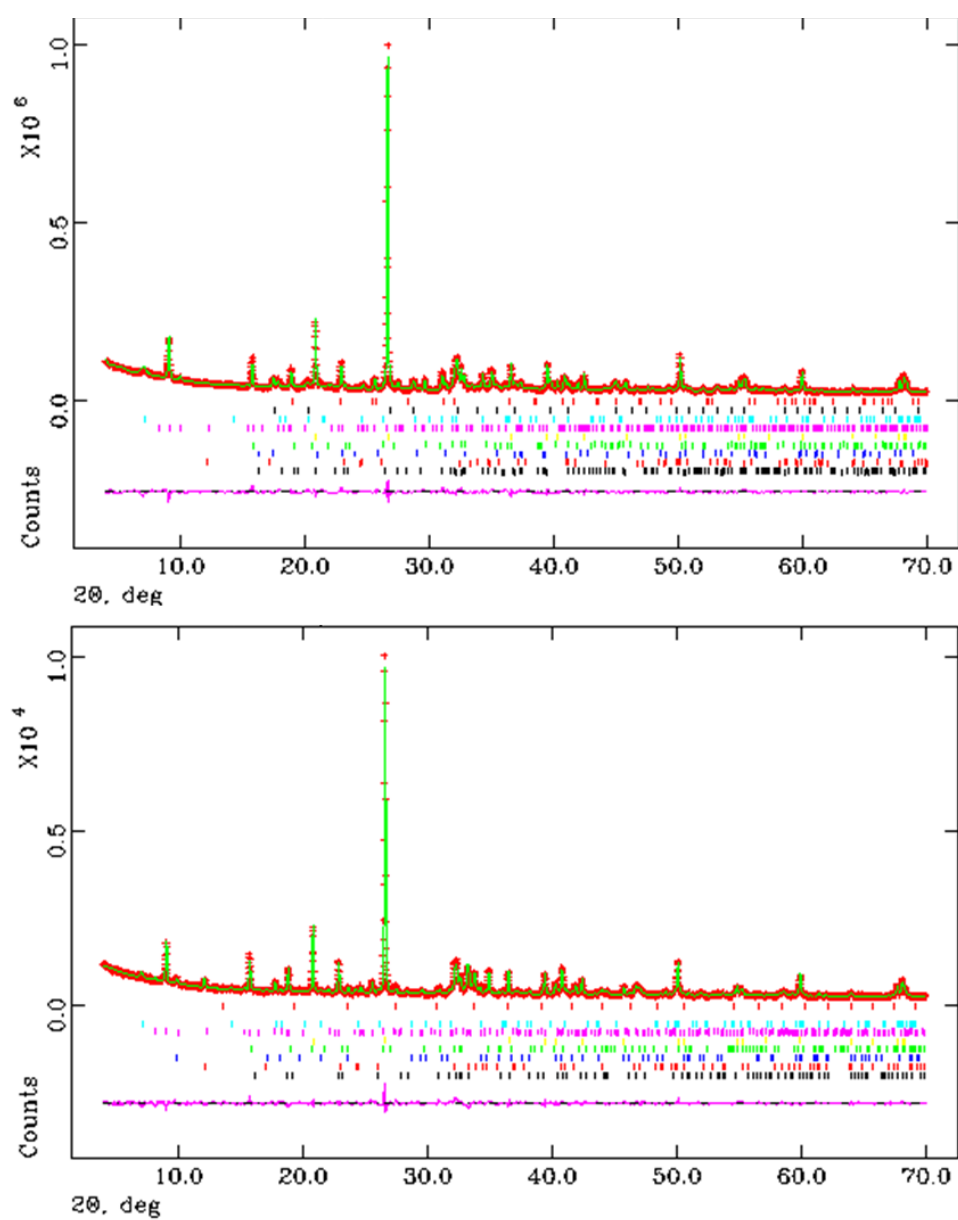

**Figure S10.** Rietveld plots of st-BYF\_wc040\_01SP\_0.25B<sub>2</sub>O<sub>3</sub> (top) and B-BYF\_wc050\_03SP (bottom) at 28 days.

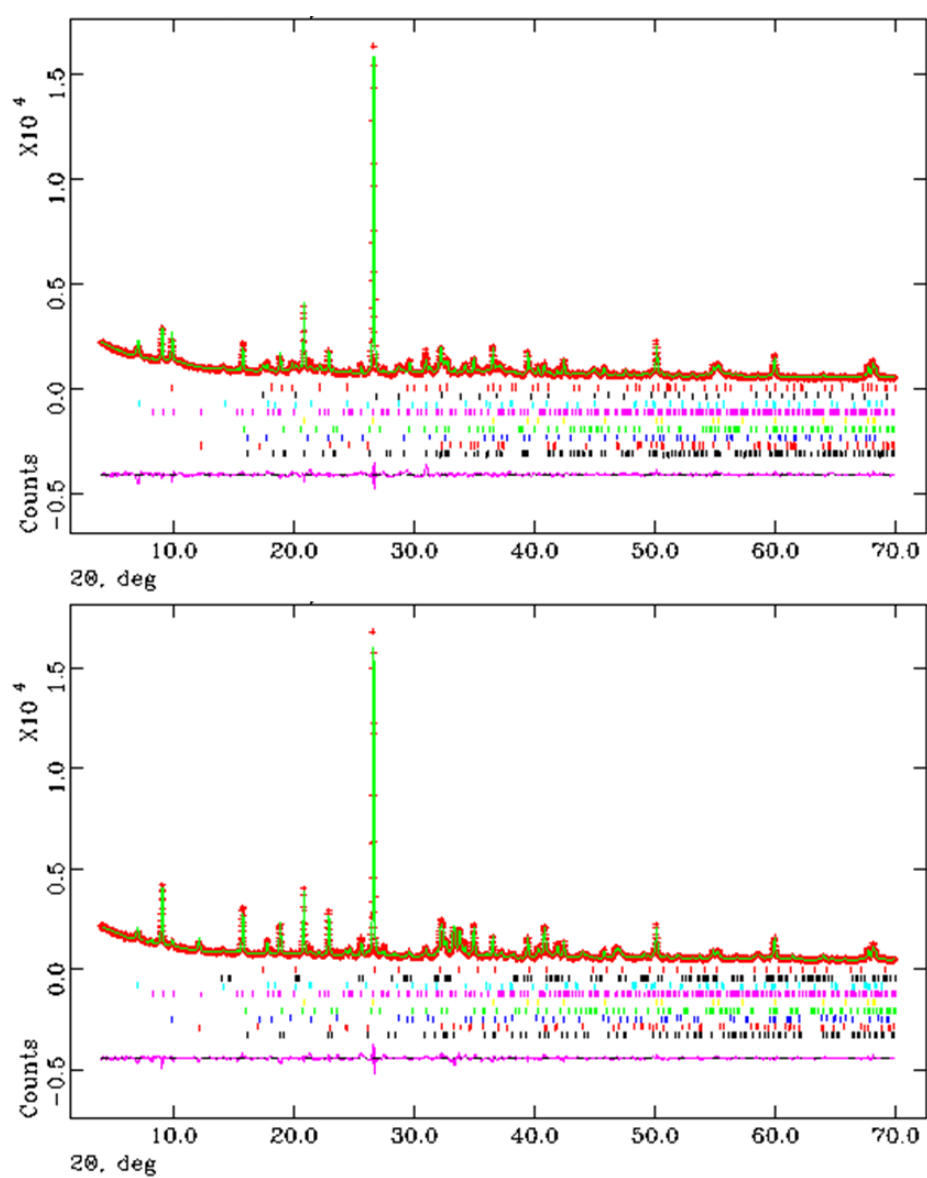

Figure S11. Rietveld plots of st-BYF\_wc060 (top) and B-BYF\_wc060 (bottom) at 120 days.
